# Supplementary material for: Enzymatic biofilm digestion in soil aggregates facilitates therelease of particulate organic matter by sonication
Source: Copernicus journal article supplement (doi:10.5194/soil-2-499-2016), 2016-10-04
Supplement: Supplementary file 1 [file soil-2-499-2016-supplement.zip]

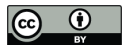

## *Supplement of*

# **Enzymatic biofilm digestion in soil aggregates facilitates the release of particulate organic matter by sonication**

**Frederick Büks and Martin Kaupenjohann**

*Correspondence to:* Frederick Büks ([frederick.bueks@tu-berlin.de](mailto:frederick.bueks@tu-berlin.de))

- [soil-2-499-2016-supplement-title-page.pdf](#)

Data Büks and Kaupenjohann.ods

The copyright of individual parts of the supplement might differ from the CC-BY 3.0 licence.
